# Supplementary material for: Effects of the Glass-Forming Ability and Annealing Conditions on Cocrystallization Behaviors via Rapid Solvent Removal: A Case Study of Voriconazole
Source: Pharmaceutics. 2020 Dec 14;12(12):1209. doi: 10.3390/pharmaceutics12121209 (PMC7764899; doi:10.3390/pharmaceutics12121209)
Supplement: Supplementary file 1 [file pharmaceutics-12-01209-s001.pdf]

# Supplementary Materials: Effects of the Glass-Forming Ability and Annealing Conditions on Cocrystallization Behaviors via Rapid Solvent Removal: A Case Study of Voriconazole

Si Nga Wong, Susan Wing Sze Chan, Xuexin Peng, Bianfei Xuan, Hok Wai Lee, Henry H.Y. Tong and Shing Fung Chow

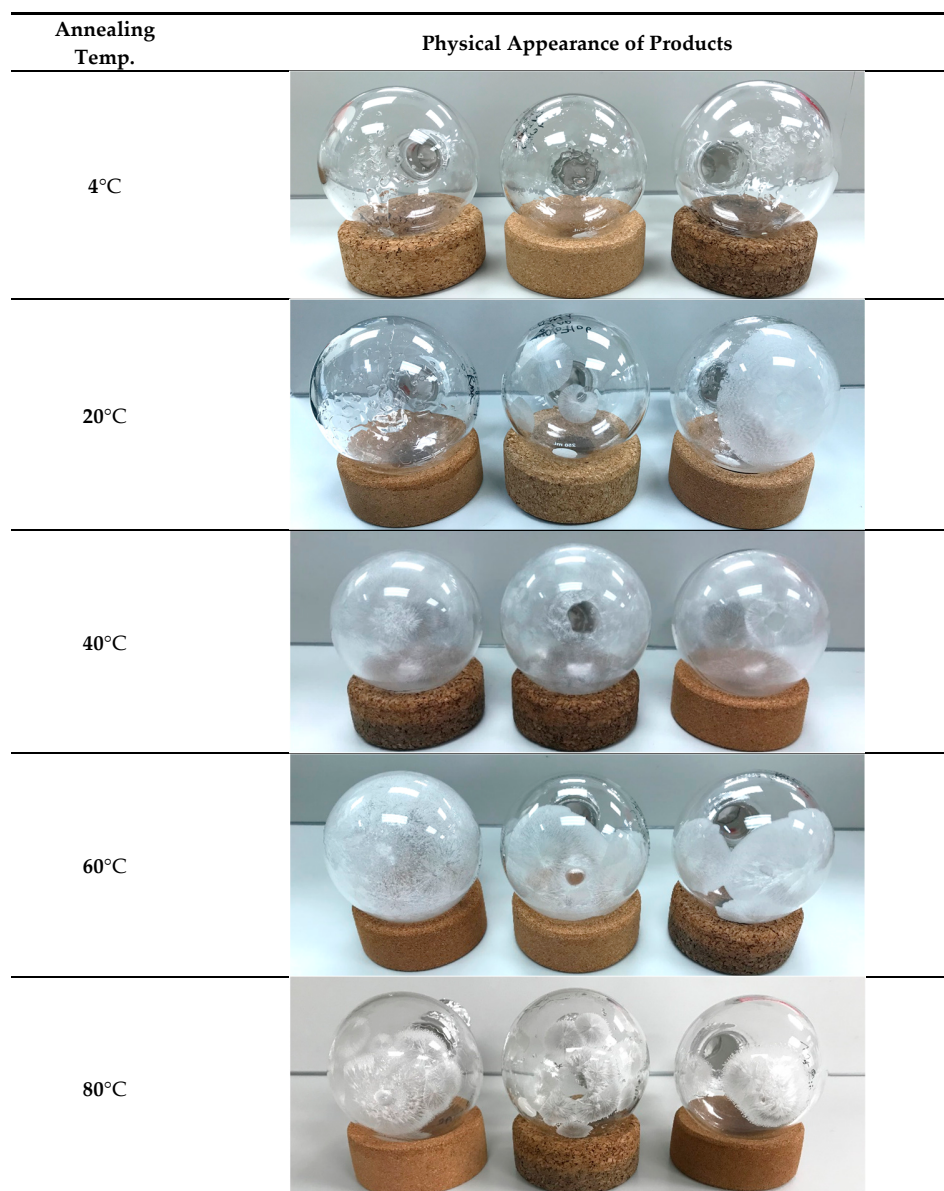

**Figure S1.** The morphology of VRC-TAR system presented in round bottom flask at different annealing temperatures ( $t_{\text{anneal}} = 3\text{d}$ ).

| Annealing Temperature (°C) | 20°C                                                                              | 60°C                                                                               | 80°C                                                                                |
|----------------------------|-----------------------------------------------------------------------------------|------------------------------------------------------------------------------------|-------------------------------------------------------------------------------------|
| Melting Temperature (°C)   | 136.8                                                                             | 135.1                                                                              | 137.4                                                                               |
| Physical Morphology        | 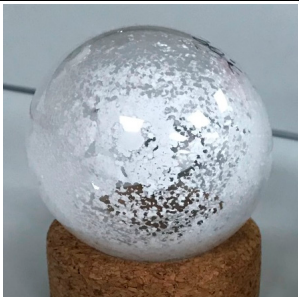 | 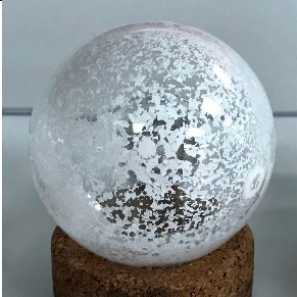 | 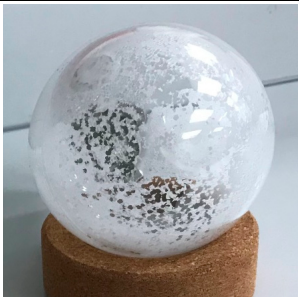 |

**Figure S2.** The melting temperatures and morphologies of VRC-FUM system at different annealing temperatures ( $t_{\text{anneal}} = 3\text{d}$ ).

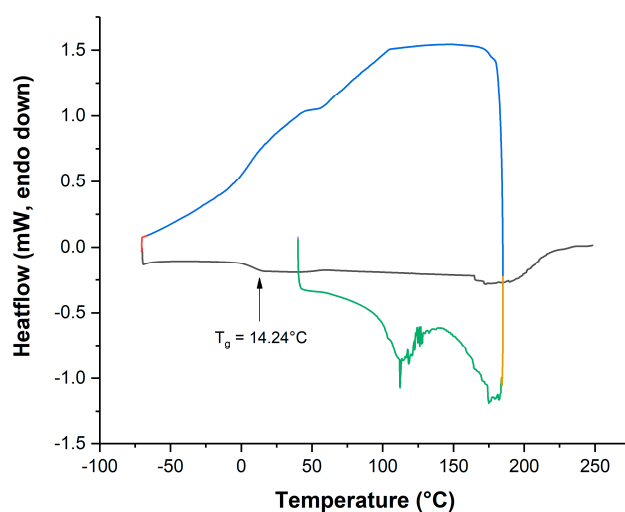

**Figure S3.**  $T_g$  determination for VRC-TAR system through DSC heat-cool-heat cycle. Green line: Heating (10 °C/min); Blue line: Quench cooling (50 °C/min); Black line: Re-heating (10 °C/min).

| Annealing Time | Physical Appearance of Products                                                      |
|----------------|--------------------------------------------------------------------------------------|
| 1 h            | 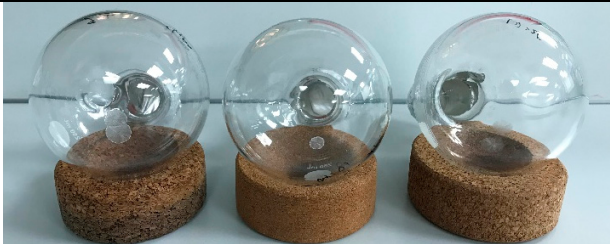 |
| 2 h            | 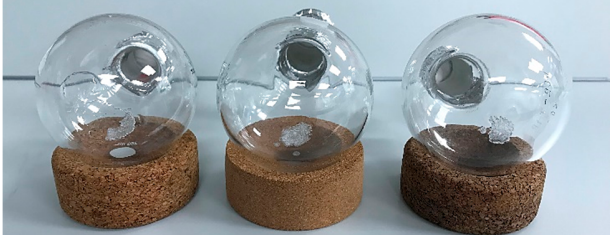 |

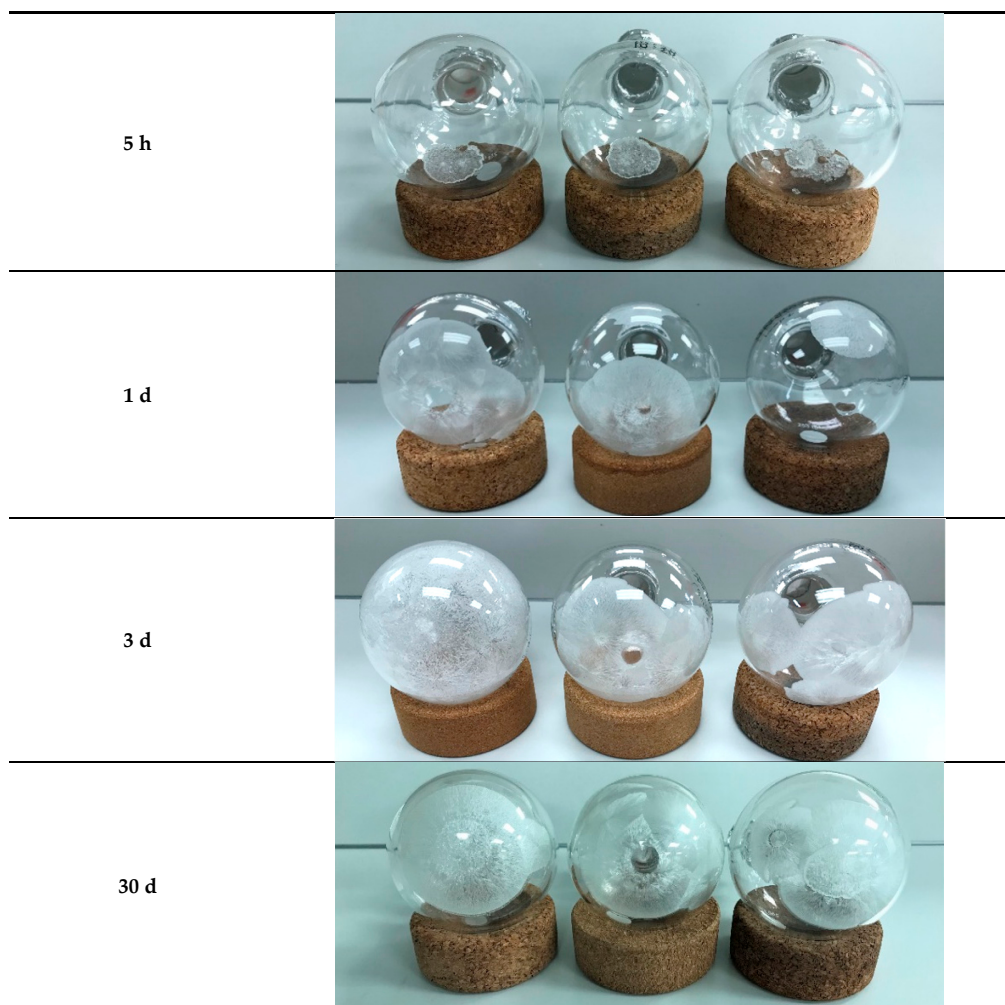

**Figure S4.** The morphology of VRC-TAR system presented in round bottom flask at different annealing time points ( $T_{\text{anneal}} = 60^{\circ}\text{C}$ ).

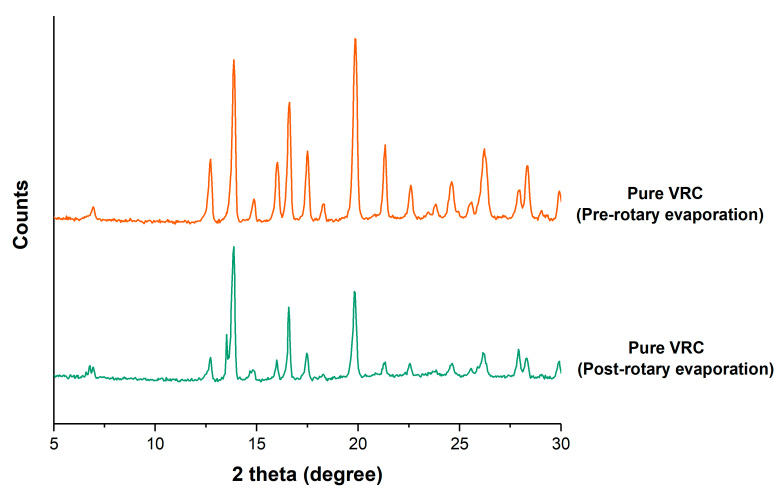

**Figure S5.** PXRD patterns of VRC pre- and post-rotary evaporation.

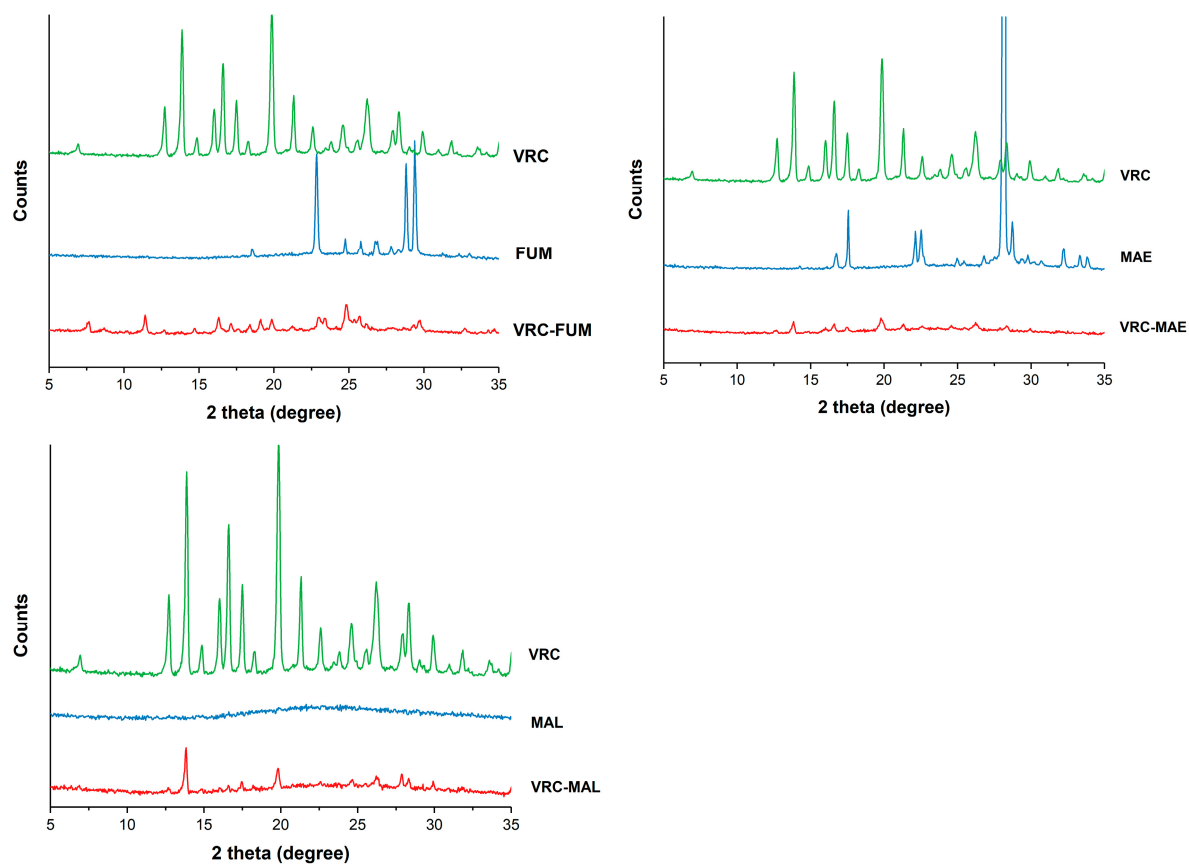

Figure S6. PXRD patterns of VRC-FUM, VRC-MAE, and VRC-MAL systems produced by rotary evaporation.

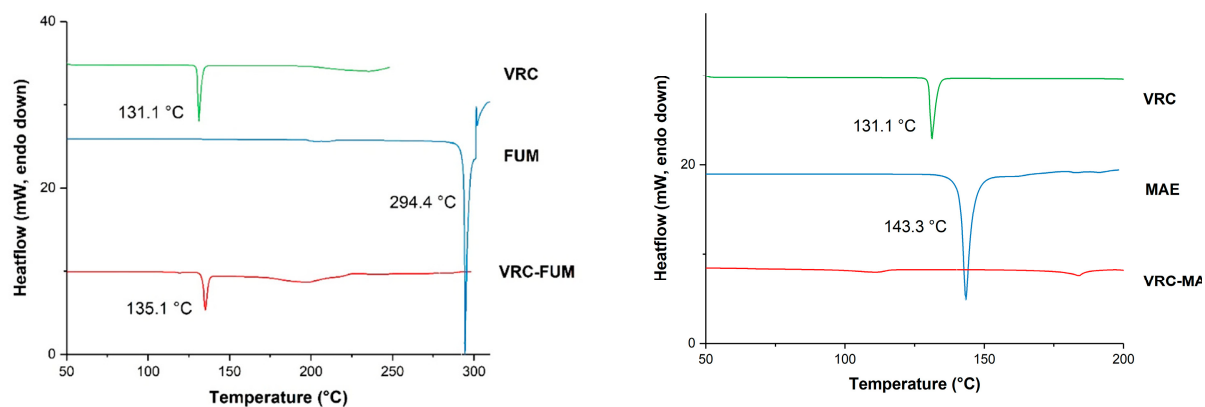

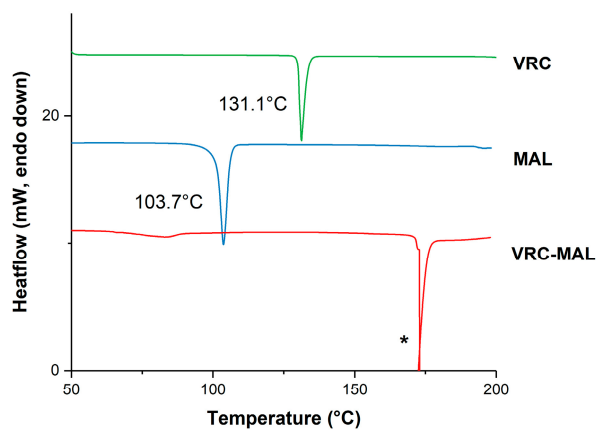

**Figure S7.** DSC profiles of VRC-FUM, VRC-MAE, VRC-MAL systems produced by rotary evaporation (\* regarded as the degradation peak of VRC-MAL).

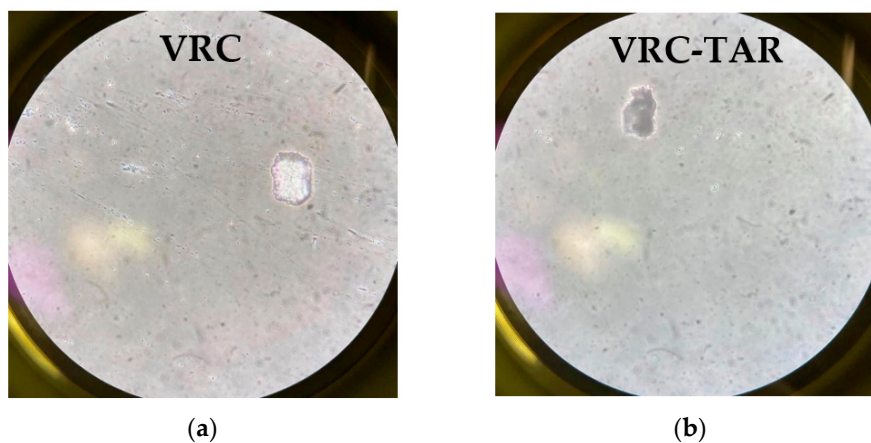

**Figure S8.** Optical micrographs of the (a) sifted VRC and (b) VRC-TAR cocrystal at a magnification of 40x.
